# Supplementary material
Source: PubMed Central journal article supplement (PMC5417203)
Supplement: SD3.pdf [file SD3.pdf]

## SUPPLEMENTAL FILE

Clinical case scenarios pertaining to assessment and management of a child with cough, difficult breathing, and diarrhea

- A. Abdullah is 3 years old and weighs 13 kg. His mother complains of fever and diarrhea. No other complaints are mentioned after history taking. His axillary temperature is 38.7°C today. On examination no other abnormalities were detected. His malaria RDT is positive.

What is the best treatment for Abdullah?

- a) Treat with Lumefantrine-Artemether (LA) 1 × 6
- b) Treat with LA 1 × 6 and ORS
- c) Treat with LA 2 × 6
- d) Treat with LA 1 × 6 and amoxicillin

Answer: b)

- B. Mary is 14 months old and weighs 7 kg. She became sick 1 day ago. Her mother complains that Mary has fever, especially at night, coughing, and loss of appetite. No other complaints are mentioned after history taking. She was given paracetamol at home. Her axillary temperature is 38.2°C today and she is breathing 45 breaths per minute. On examination no other abnormalities were detected.

Which of the following is the best course of action for Mary?

- a) LA
- b) LA and amoxicillin
- c) Amoxicillin and order a malaria RDT
- d) Amoxicillin alone

Answer: c)

- C. George is 9 months old and weighs 6 kg. He became sick 2 days ago. His mother complains that he has fever, cough productive of green sputum, and loss of appetite. He is able to breastfeed and was given paracetamol at home. No other complaints are mentioned after history taking. His axillary temperature is 38.7°C today and he is breathing fast at 54 breaths per minute. On examination no other abnormalities were detected. A malaria RDT taken today was positive.

Which of the following is the best treatment for George?

- a) LA
- b) LA and amoxicillin
- c) Amoxicillin alone

Answer: b)

- D. Fatima is 11 months old and weighs 7 kg. She became sick 1 day ago. Her mother complains of fever, dry cough, and lethargy. Her mother also complains that she has not been waking up to breastfeed. No other complaints are mentioned after history taking. Her axillary temperature is 38.9°C today, she is breathing fast at 54 breaths per minute and she has some chest indrawing.

Which of the following is the best treatment for Fatima?

- a) LA alone
- b) LA and amoxicillin
- c) Amoxicillin alone
- d) Quinine/artesunate injection and amoxicillin
- e) Quinine/artesunate injection and penicillin injection
- f) Refer for admission to inpatient unit
- g) Quinine/artesunate injection, penicillin injection, and refer for admission to inpatient unit

Answer: g)

SUPPLEMENTAL TABLE 1

Antibiotic dosing for those who received recommended pneumonia treatment with dosing information available (*N* = 81)

|                                                                                                             | <i>N</i> | Weighted %* | 95% CI    |
|-------------------------------------------------------------------------------------------------------------|----------|-------------|-----------|
| Recommended antibiotic dose, frequency, and duration given for pneumonia according to local IMCI guidelines | 38       | 47.7        | 37.7–57.7 |
| Recommended antibiotic selected, but under-dosed                                                            | 42       | 49.8        | 38.7–61.0 |
| Recommended antibiotic dose and frequency given, but longer duration (7 days) given                         | 1        | 2.4         | 0–7.2     |

CI = confidence interval; IMCI = integrated management of childhood illness.

\*Accounts for outpatient department and patient sampling probabilities and nonresponse. The analysis also accounts for clustering at the health facility level.
